# Supplementary material for: Enriched graphitic N-doped carbon-supported Fe3O4 nanoparticles as efficient electrocatalysts for oxygen reduction reaction
Source: Royal Society of Chemistry journal article supplement (doi:10.1039/c4ta00029c), 2014-01-01
Supplement: c4ta00029c1.pdf [file c4ta00029c1.pdf]

## Supporting Information

### **Enriched graphitic N-doped carbon-supported Fe<sub>3</sub>O<sub>4</sub> nanoparticles as efficient electrocatalysts for oxygen reduction reaction**

Yunhe Su,<sup>a,b</sup> Hongliang Jiang,<sup>a</sup> Yihua Zhu,<sup>\*a</sup> Xiaoling Yang,<sup>a</sup> Jianhua Shen,<sup>a</sup> Wenjian Zou,<sup>a</sup> Jianding Chen,<sup>\*b</sup> and Chunzhong Li<sup>a</sup>

<sup>a</sup> Key Laboratory for Ultrafine Materials of Ministry of Education, School of Materials Science and Engineering, East China University of Science and Technology, Shanghai, 200237, P. R. China.

E-mail: yhzhu@ecust.edu.cn (Prof. Y. H. Zhu), Fax: +86 21 64250624

<sup>b</sup> School of Materials Science and Engineering, East China University of Science and Technology, Shanghai, 200237, P. R. China.

Email: jiandingchen@ecust.edu.cn (Prof. J. D. Chen)

\*Author(s) to whom correspondence should be addressed.

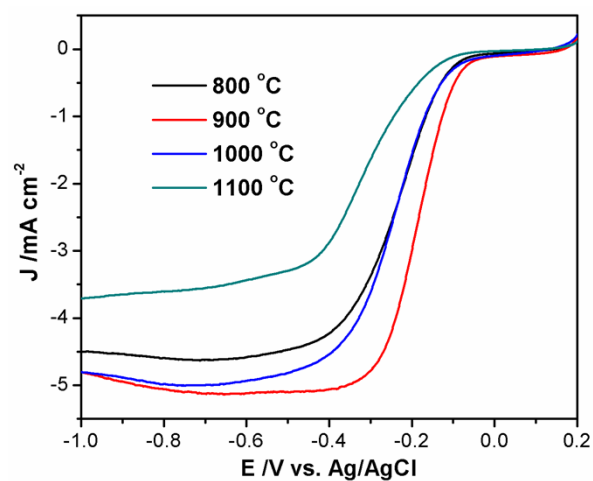

**Figure S1.** Linear sweep voltammograms at 1600 rpm for  $\text{Fe}_3\text{O}_4/\text{N-C}$  samples carbonized under different temperatures in  $\text{O}_2$ -saturated 0.1 M KOH.

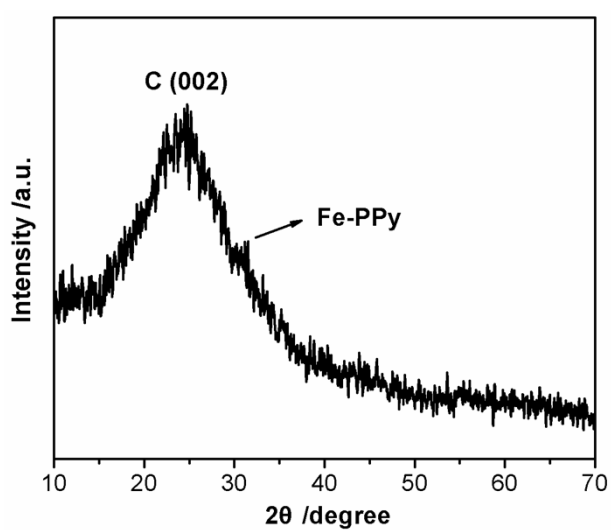

**Figure S2.** XRD patterns of Fe-PPy.

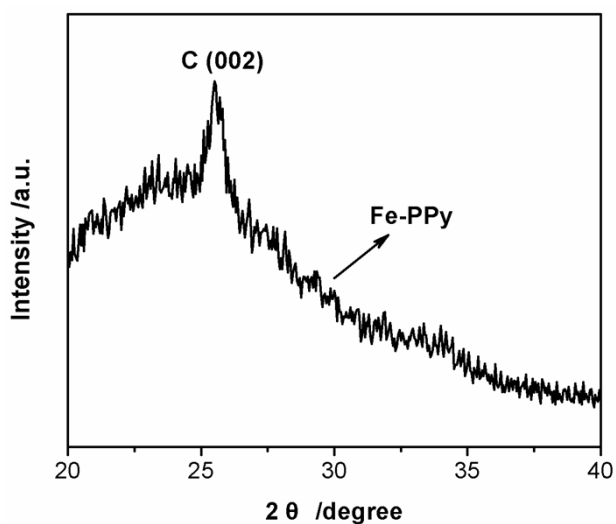

**Figure S3.** Step scanning XRD patterns of Fe-PPy at a very slow scan rate of  $1\text{ }^\circ\text{C}/\text{min}$  from 20 to 40 degree.

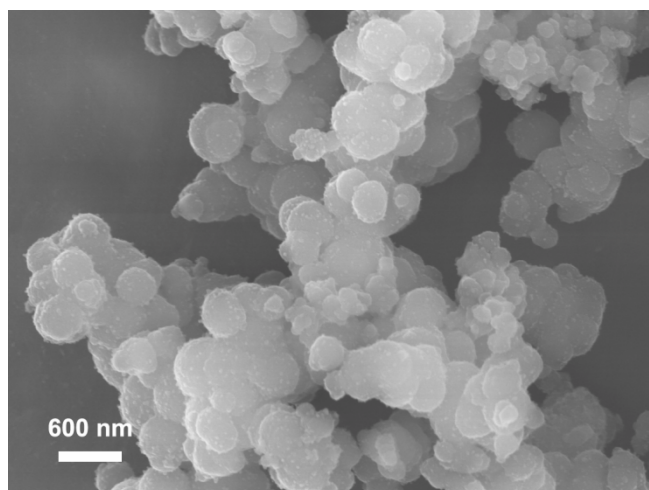

**Figure S4.** SEM image of Fe-PPy.

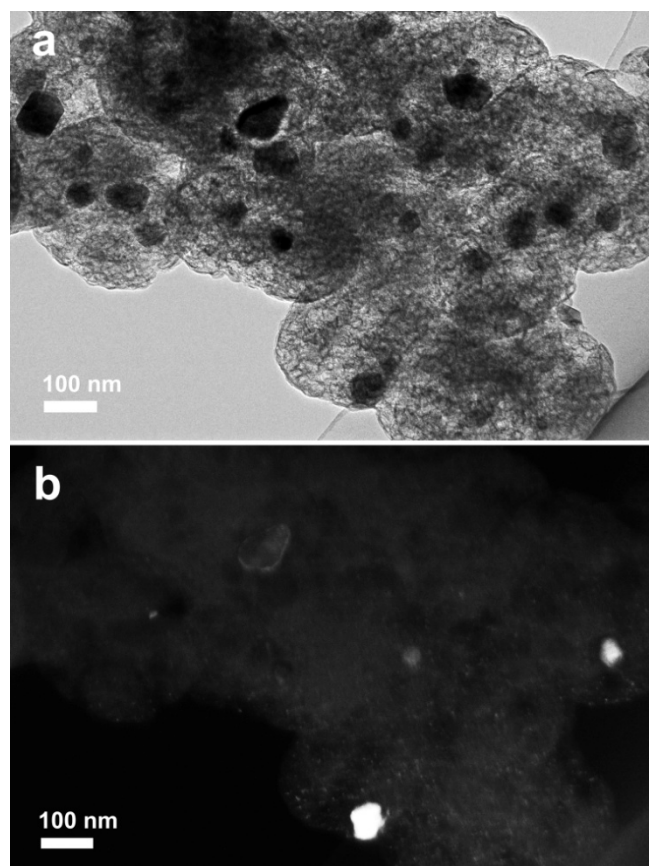

**Figure S5.** (a) TEM and (b) the corresponding dark-field TEM images of Fe<sub>3</sub>O<sub>4</sub>/N-C-900.

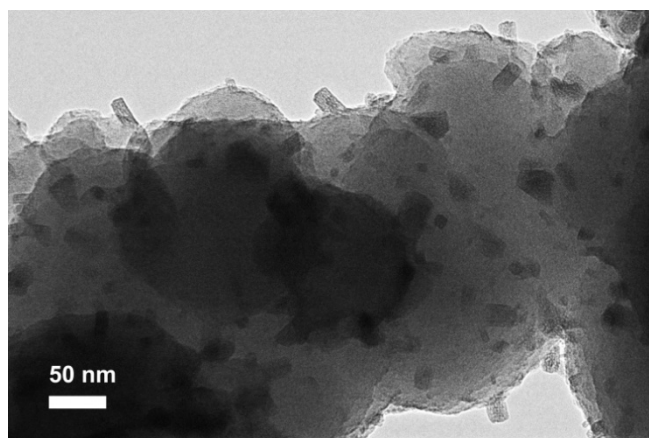

Figure S6. TEM image of Fe-PPy.

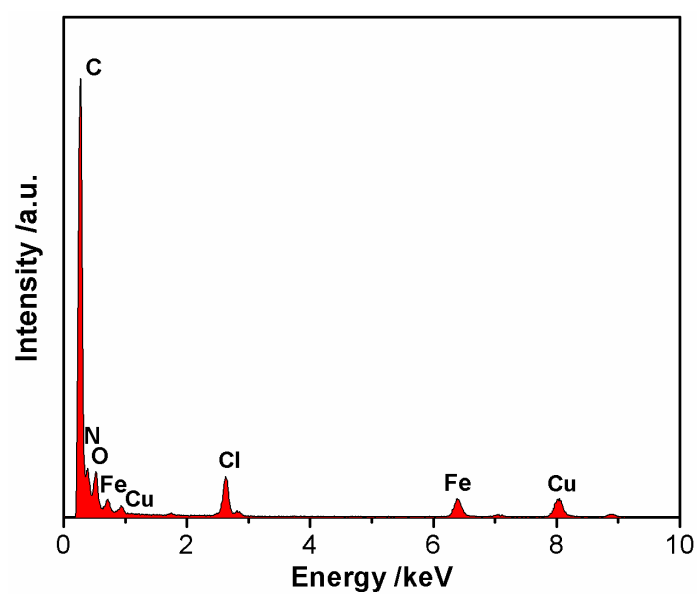

Figure S7. EDX spectroscopy of Fe-PPy.

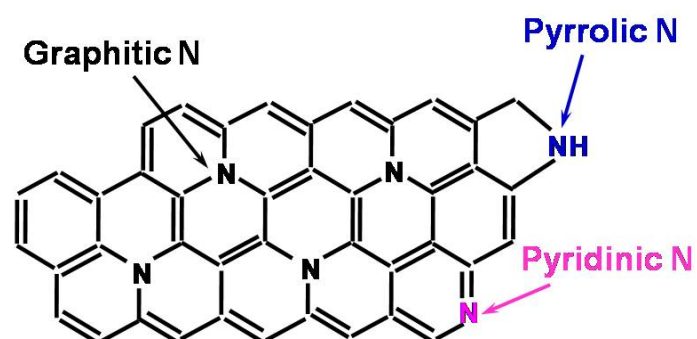

Scheme S1. Schematic structure of the bonding configurations of N atoms in N-doped carbon.

**Table S1.** Elemental composition by XPS (at %).

| Sample                                  | C 1s | N 1s | O 1s | Fe 2p |
|-----------------------------------------|------|------|------|-------|
| Fe <sub>3</sub> O <sub>4</sub> /N-C-900 | 89.3 | 2.4  | 7.5  | 0.8   |

**Table S2.** C 1s composition from XPS (at %).

| Peak      | Component | BE (eV) | Atomic % |
|-----------|-----------|---------|----------|
| C=C       | C 1s      | 284.6   | 68.6     |
| C=N & C-O | C 1s      | 285.6   | 14.3     |
| C-N & C=O | C 1s      | 287     | 10.1     |
| O-C=O     | C 1s      | 290     | 7.0      |

**Table S3.** N 1s composition from XPS (at %).

| Peak        | Component | BE (eV) | Atomic % |
|-------------|-----------|---------|----------|
| Pyridinic N | N 1s      | 398.3   | 14.2     |
| Pyrrolic N  | N 1s      | 400.1   | 3.5      |
| Graphitic N | N 1s      | 401.2   | 78.0     |
| Oxidized N  | N 1s      | 403.5   | 4.3      |

**Table S4.** Fe 2p composition from XPS (at %).

| Peak                                         | Component | BE (eV) | Atomic % |
|----------------------------------------------|-----------|---------|----------|
| Fe <sup>2+</sup> , Fe <sup>3+</sup> , 2p 1/2 | Fe 2p     | 725.2   | 19       |
| Fe <sup>2+</sup> , 2p 1/2                    | Fe 2p     | 723     | 10.1     |
| Satellite Peak                               | Fe 2p     | 718.7   | 8.7      |
| Fe <sup>2+</sup> , 2p 3/2                    | Fe 2p     | 713.6   | 19.9     |
| Fe <sup>3+</sup> , 2p 3/2                    | Fe 2p     | 710.9   | 42.3     |

**Table S5.** O 1s composition from XPS (at %).

| Peak                                        | Component | BE (eV) | Atomic % |
|---------------------------------------------|-----------|---------|----------|
| Hydroxyls                                   | O 1s      | 533.1   | 39.2     |
| Carboxyls                                   | O 1s      | 532.0   | 33.2     |
| O-physically absorbed/carbonates            | O 1s      | 530.8   | 12.1     |
| O related to Fe <sub>3</sub> O <sub>4</sub> | O 1s      | 530.2   | 15.5     |

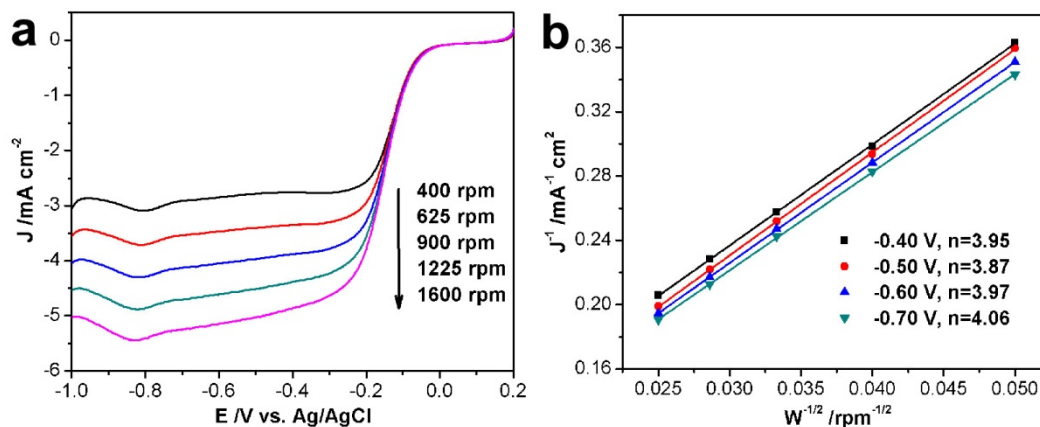

**Figure S8.** (a) Linear sweep voltammograms and (b) K-L plots at different potential for Pt/C catalyst in  $O_2$ -saturated 0.1 M KOH solution.

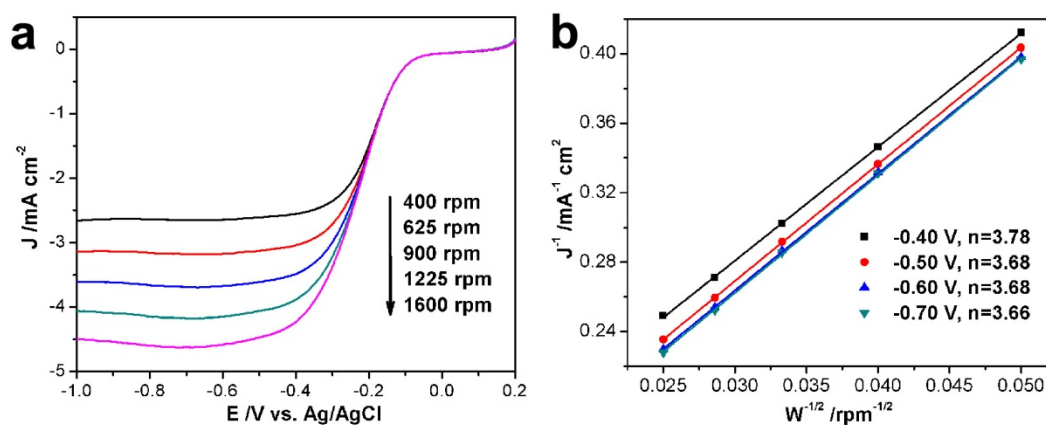

**Figure S9.** (a) Linear sweep voltammograms and (b) K-L plots at different potential for  $Fe_3O_4/N-C-800$  in  $O_2$ -saturated 0.1 M KOH solution.

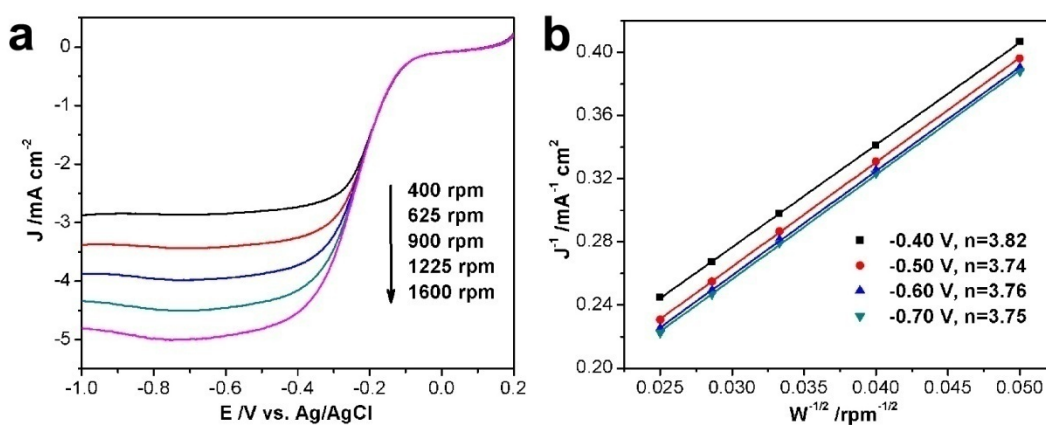

**Figure S10.** (a) Linear sweep voltammograms and (b) K-L plots at different potential for  $Fe_3O_4/N-C-1000$  in  $O_2$ -saturated 0.1 M KOH solution.

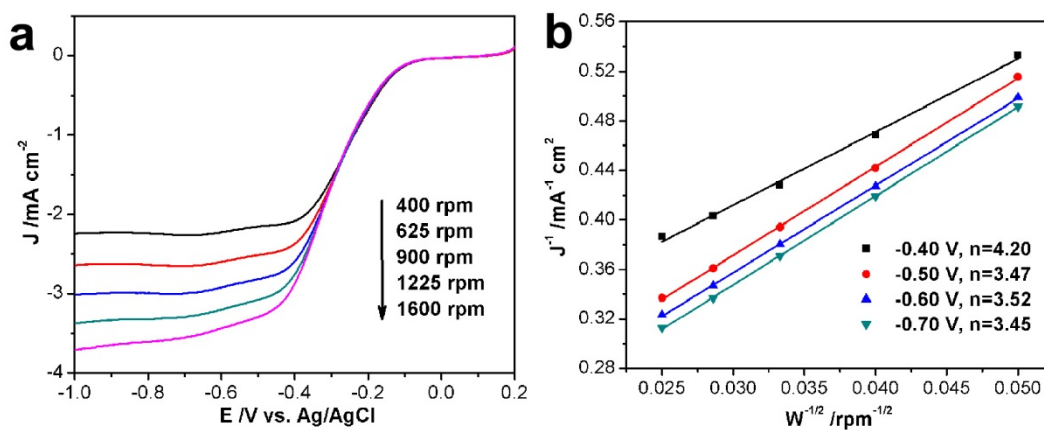

**Figure S11.** (a) Linear sweep voltammograms and (b) K-L plots at different potential for Fe<sub>3</sub>O<sub>4</sub>/N-C-1100 in O<sub>2</sub>-saturated 0.1 M KOH solution.

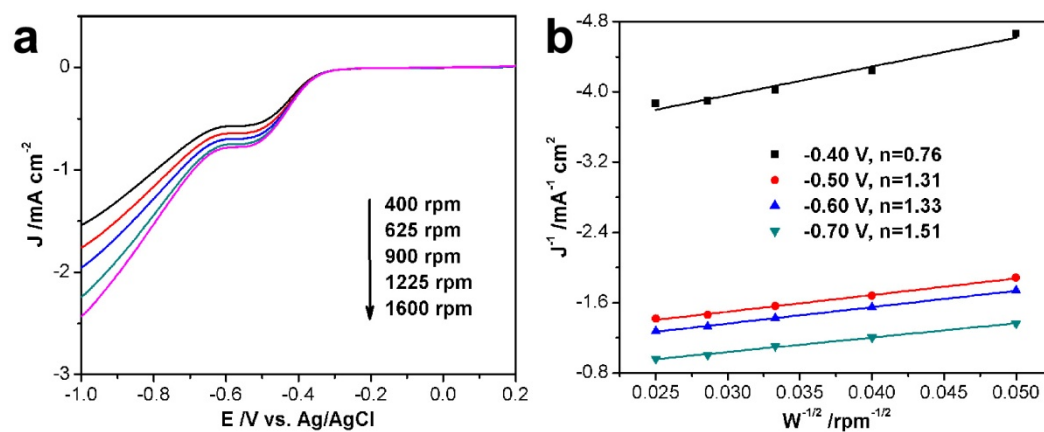

**Figure S12.** (a) Linear sweep voltammograms and (b) K-L plots at different potential for pristine Fe<sub>3</sub>O<sub>4</sub> nanoparticles in O<sub>2</sub>-saturated 0.1 M KOH solution.

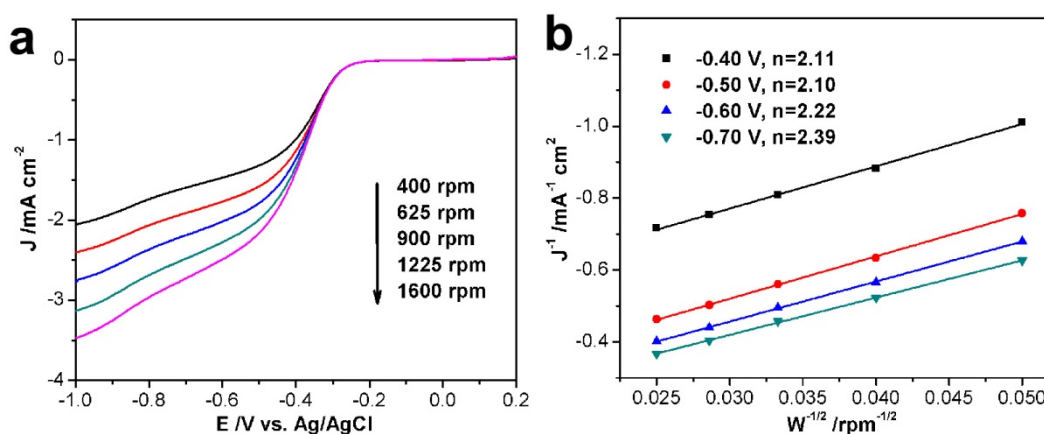

**Figure S13.** (a) Linear sweep voltammograms and (b) K-L plots at different potential for N-doped carbon in O<sub>2</sub>-saturated 0.1 M KOH solution.

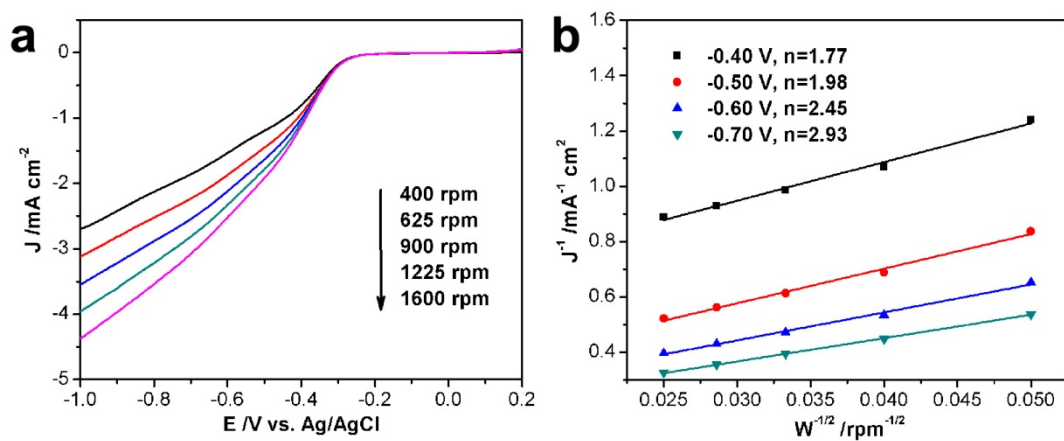

**Figure S14.** (a) Linear sweep voltammograms and (b) K-L plots at different potential for physical mixture of N-doped carbon and  $\text{Fe}_3\text{O}_4$  nanoparticles in  $\text{O}_2$ -saturated 0.1 M KOH solution.
